# Supplementary material
Source: PubMed Central journal article supplement (PMC4804472)

# Supplementary data

## **Motility, chemotaxis and aerotaxis contribute to competitiveness during bacterial pellicle biofilm development**

Theresa Hölscher<sup>1,#</sup>, Benjamin Bartels<sup>1,#</sup>, Yu-Cheng Lin<sup>2,#</sup>, Ramses Gallegos-Monterrosa<sup>1</sup>, Alexa Price-Whelan<sup>2</sup>, Roberto Kolter<sup>3</sup>, Lars E.P. Dietrich<sup>2</sup>, Ákos T. Kovács<sup>1,\*</sup>

**1 - Terrestrial Biofilms Group**, Institute of Microbiology, Friedrich Schiller University Jena, Jena, D-07743, Germany

**2 - Department of Biological Sciences**, Columbia University, New York, New York, NY 10027, USA

**3 - Department of Microbiology and Immunobiology**, Harvard Medical School, Boston, MA 02115, USA

\*Correspondence to Ákos T. Kovács: [akos-tibor.kovacs@uni-jena.de](mailto:akos-tibor.kovacs@uni-jena.de)

Postal address: Neugasse 23, D-07743 Jena, Germany

Tel: +49 3641 949980

Fax: +49 3641 949292

**Fig. S1** Growth curves of *B. subtilis* strains lacking certain genes involved in flagellum synthesis and regulation (A), chemotaxis (B), and aerotaxis (C) compared to the wild-type strain (black line). Growth in LB medium was followed by recording optical density at 595 nm in a microtiter-plate reader. Growth curves represent the average of 6 replicates and error bars indicate standard deviation.

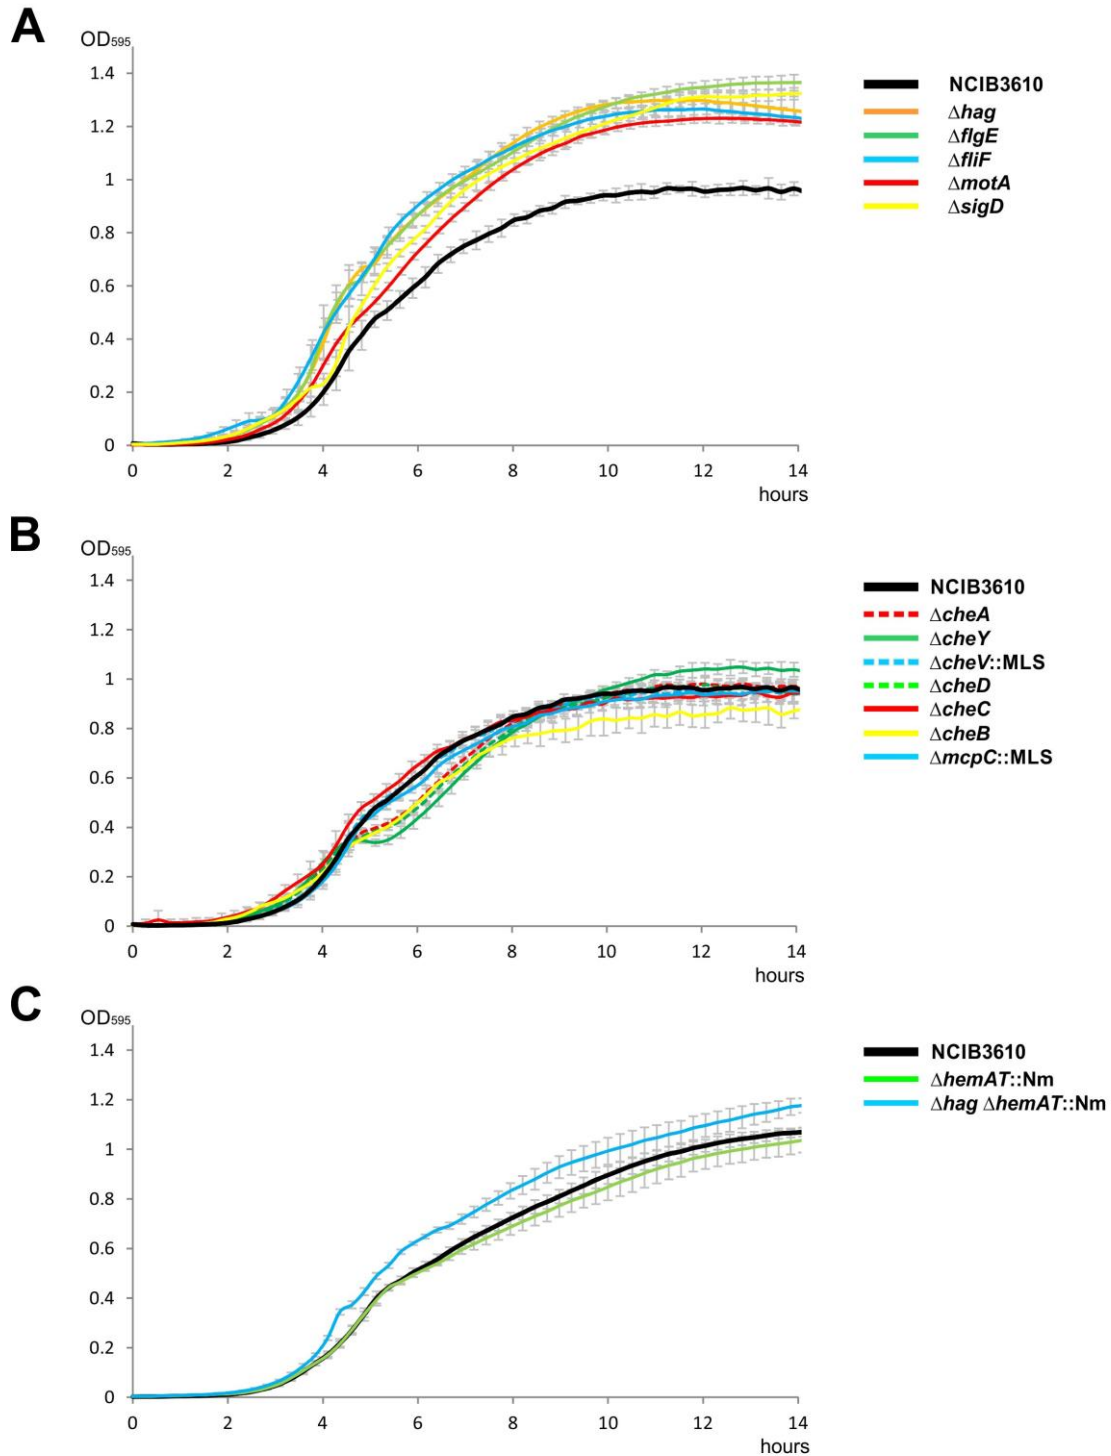

**Fig. S2** Competition of GFP or mKATE2 labelled strains of *B. subtilis* strains during pellicle formation. Wells of a 24-well plate containing mixes of cells are shown in the green- or red-fluorescence channels (false coloured in green and red, respectively) together with its bright light images. The images in the right side of the figure show the pellicle pictures of the pure mutant cultures.

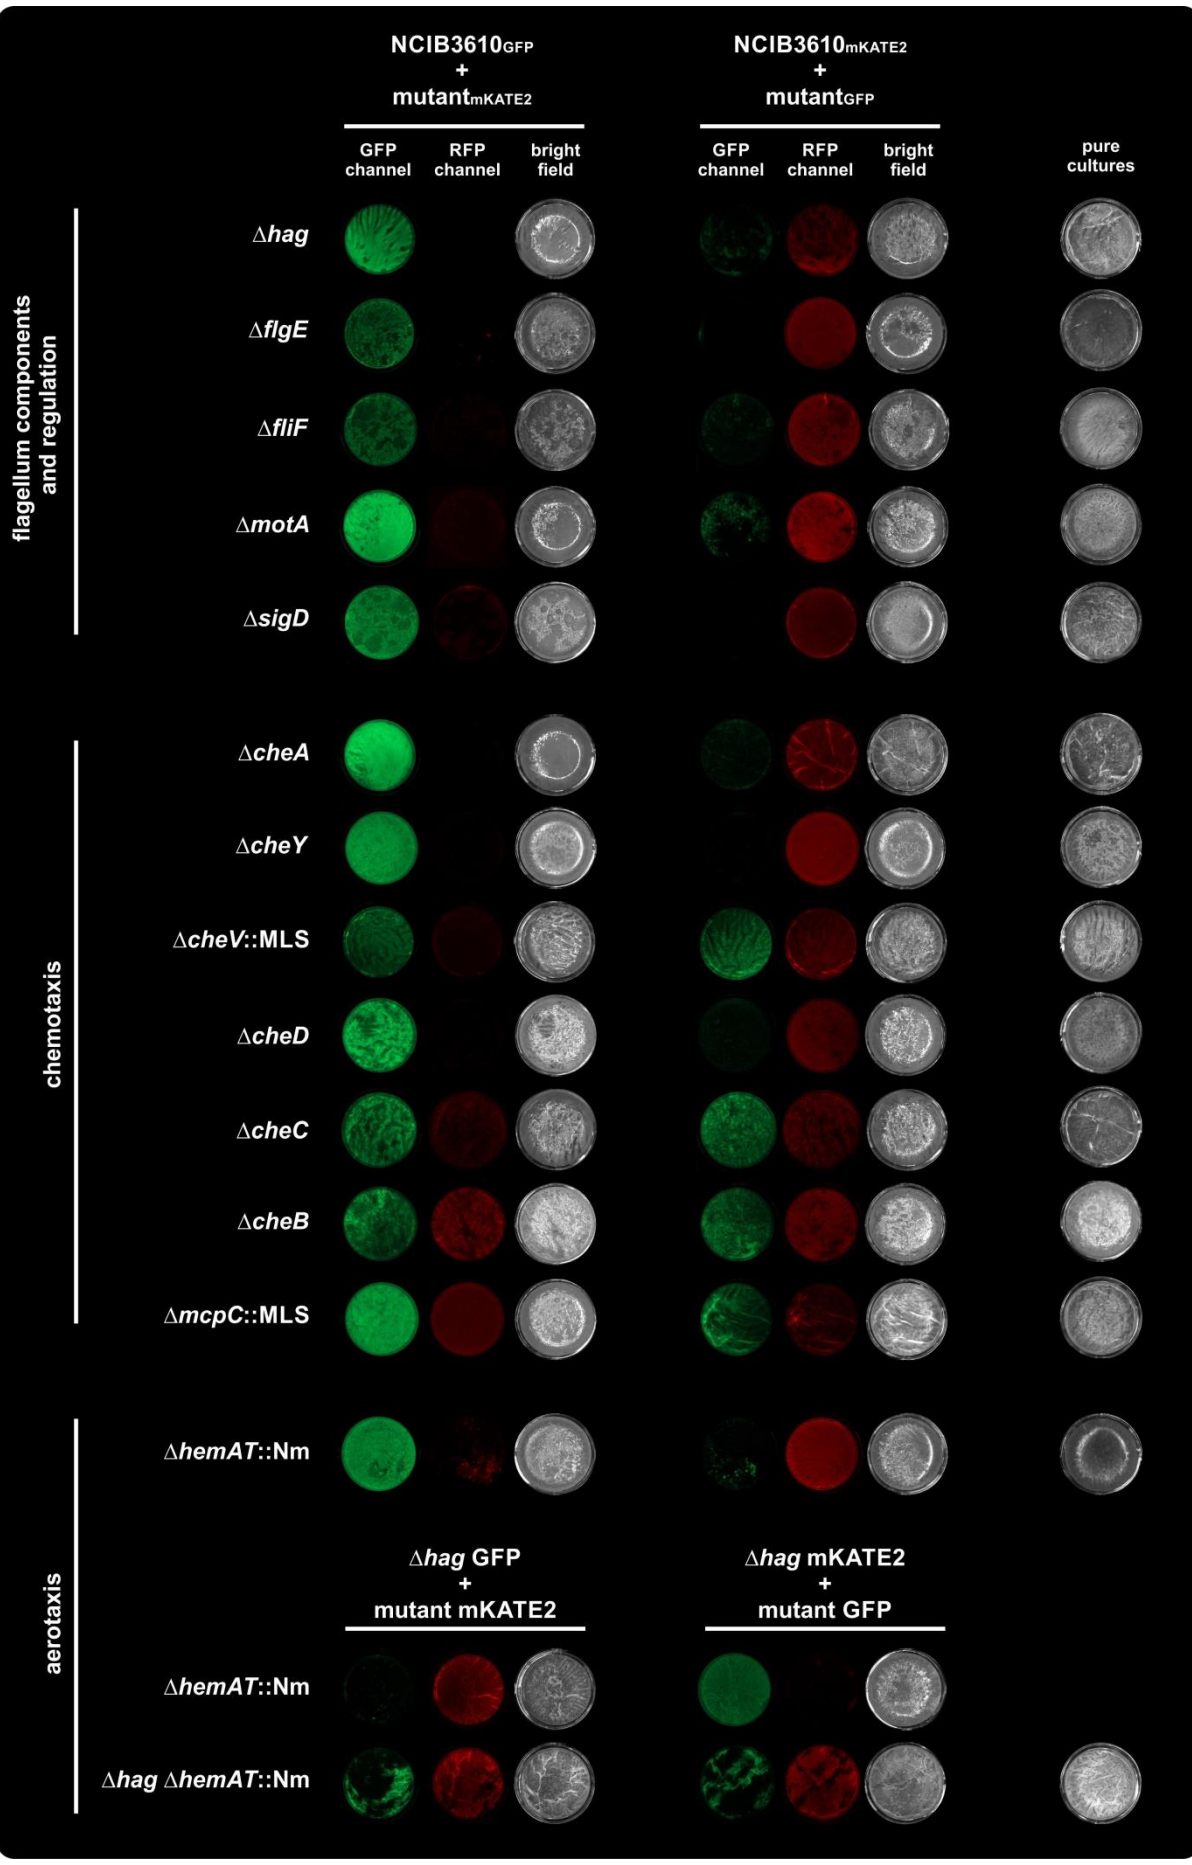

**Table S1.** Competition experiments of various *B. subtilis* mutant strains lacking motility, chemotaxis or oxygen sensing against wild-type strain (3610) during pellicle formation. Values are arbitrary units as described in the Materials and Methods.

| Strains                                                                       | Signal abundance |           | Strains                                                                       | Signal abundance |           |
|-------------------------------------------------------------------------------|------------------|-----------|-------------------------------------------------------------------------------|------------------|-----------|
|                                                                               | GFP              | mKATE2    |                                                                               | GFP              | mKATE2    |
| <i>flagellum synthesis and function</i>                                       |                  |           |                                                                               |                  |           |
| 3610 <sub>GFP</sub> vs $\Delta$ <i>hag</i> <sub>mKATE2</sub>                  | 2.41±0.53        | 0.03±0.02 | 3610 <sub>mKATE2</sub> vs $\Delta$ <i>hag</i> <sub>GFP</sub>                  | 0.08±0.05        | 2.51±0.29 |
| 3610 <sub>GFP</sub> vs $\Delta$ <i>flgE</i> <sub>mKATE2</sub>                 | 1.67±0.37        | 0.16±0.08 | 3610 <sub>mKATE2</sub> vs $\Delta$ <i>flgE</i> <sub>GFP</sub>                 | 0.16±0.11        | 5.24±2.69 |
| 3610 <sub>GFP</sub> vs $\Delta$ <i>fliF</i> <sub>mKATE2</sub>                 | 1.43±0.25        | 0.11±0.02 | 3610 <sub>mKATE2</sub> vs $\Delta$ <i>fliF</i> <sub>GFP</sub>                 | 0.59±0.21        | 2.20±0.35 |
| 3610 <sub>GFP</sub> vs $\Delta$ <i>motA</i> <sub>mKATE2</sub>                 | 2.08±0.92        | 0.21±0.08 | 3610 <sub>mKATE2</sub> vs $\Delta$ <i>motA</i> <sub>GFP</sub>                 | 0.33±0.17        | 3.38±0.98 |
| 3610 <sub>GFP</sub> vs $\Delta$ <i>sigD</i> <sub>mKATE2</sub>                 | 1.41±0.42        | 0.04±0.01 | 3610 <sub>mKATE2</sub> vs $\Delta$ <i>sigD</i> <sub>GFP</sub>                 | 0.38±0.29        | 2.29±0.24 |
| <i>chemotaxis</i>                                                             |                  |           |                                                                               |                  |           |
| 3610 <sub>GFP</sub> vs $\Delta$ <i>cheA</i> <sub>mKATE2</sub>                 | 2.35±0.57        | 0.03±0.01 | 3610 <sub>mKATE2</sub> vs $\Delta$ <i>cheA</i> <sub>GFP</sub>                 | 0.26±0.18        | 3.18±0.56 |
| 3610 <sub>GFP</sub> vs $\Delta$ <i>cheY</i> <sub>mKATE2</sub>                 | 1.82±0.25        | 0.05±0.03 | 3610 <sub>mKATE2</sub> vs $\Delta$ <i>cheY</i> <sub>GFP</sub>                 | 0.11±0.02        | 2.32±0.34 |
| 3610 <sub>GFP</sub> vs $\Delta$ <i>cheV</i> <sub>mKATE2</sub>                 | 1.31±0.41        | 0.48±0.15 | 3610 <sub>mKATE2</sub> vs $\Delta$ <i>cheV</i> <sub>GFP</sub>                 | 0.63±0.12        | 1.54±0.24 |
| 3610 <sub>GFP</sub> vs $\Delta$ <i>cheD</i> <sub>mKATE2</sub>                 | 2.11±0.27        | 0.09±0.04 | 3610 <sub>mKATE2</sub> vs $\Delta$ <i>cheD</i> <sub>GFP</sub>                 | 0.09±0.03        | 2.66±0.44 |
| 3610 <sub>GFP</sub> vs $\Delta$ <i>cheC</i> <sub>mKATE2</sub>                 | 0.60±0.18        | 1.61±0.35 | 3610 <sub>mKATE2</sub> vs $\Delta$ <i>cheC</i> <sub>GFP</sub>                 | 1.27±0.15        | 0.76±0.47 |
| 3610 <sub>GFP</sub> vs $\Delta$ <i>cheB</i> <sub>mKATE2</sub>                 | 0.75±0.23        | 1.02±0.28 | 3610 <sub>mKATE2</sub> vs $\Delta$ <i>cheB</i> <sub>GFP</sub>                 | 1.33±0.46        | 1.39±0.65 |
| 3610 <sub>GFP</sub> vs $\Delta$ <i>mcpC</i> <sub>mKATE2</sub>                 | 0.70±0.14        | 1.14±0.12 | 3610 <sub>mKATE2</sub> vs $\Delta$ <i>mcpC</i> <sub>GFP</sub>                 | 1.11±0.11        | 0.7±0.17  |
| <i>aerotaxis</i>                                                              |                  |           |                                                                               |                  |           |
| 3610 <sub>GFP</sub> vs $\Delta$ <i>hemAT</i> <sub>mKATE2</sub>                | 1.72±0.33        | 0.10±0.09 | 3610 <sub>mKATE2</sub> vs $\Delta$ <i>hemAT</i> <sub>GFP</sub>                | 0.55±0.33        | 2.20±0.46 |
| $\Delta$ <i>hag</i> <sub>GFP</sub> vs $\Delta$ <i>hemAT</i> <sub>mKATE2</sub> | 0.59±0.37        | 1.66±0.24 | $\Delta$ <i>hag</i> <sub>mKATE2</sub> vs $\Delta$ <i>hemAT</i> <sub>GFP</sub> | 1.56±0.26        | 0.05±0.05 |
| $\Delta$ <i>hag</i> <sub>GFP</sub> vs $\Delta$ <i>hemAT</i> <sub>mKATE2</sub> | 1.57±1.30        | 1.30±0.40 | $\Delta$ <i>hag</i> <sub>mKATE2</sub> vs $\Delta$ <i>hemAT</i> <sub>GFP</sub> | 1.87±0.86        | 0.69±0.35 |

**Video S1** Pellicle formation of *B. subtilis* wild-type (left petri-dish) and its  $\Delta hag$  derivative (right petri-dish) is shown in MSgg medium. Cultures were grown in 35 mm diameter Falcon petri dishes at 30 °C and images were recorded every 30 min.

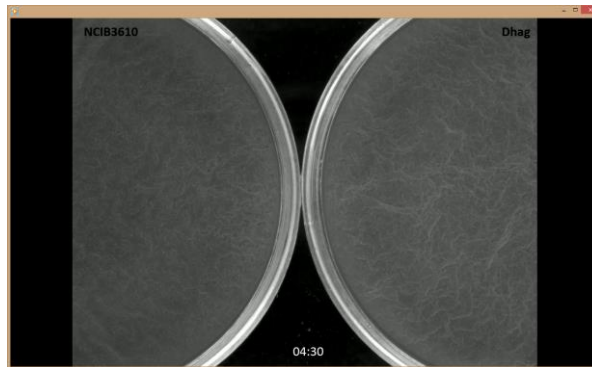

**Video S2** Competition of GFP or mKATE2 labelled wild-type and  $\Delta hag$  strains of *B. subtilis* strains during pellicle formation (GFP and mKATE2 signals were false coloured in green and red, respectively). Cultures were grown in 35 mm diameter Falcon petri dishes at 30 °C and images were recorded every 15 min. Left: NCIB3610<sub>GFP</sub> co-inoculated with  $\Delta hag$ <sub>mKATE2</sub> strain. Right: NCIB3610<sub>mKATE2</sub> co-inoculated with  $\Delta hag$ <sub>GFP</sub> strain.

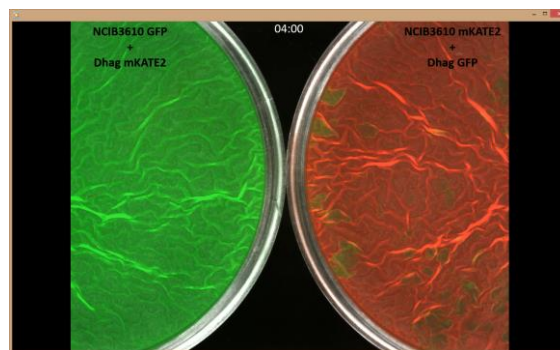

**Video S3** Pellicle formation of *B. subtilis* cultures recorded from the side of the glass tubes. Cultures were inoculated in MSgg medium at high cell densities ( $OD_{500}$  of 1.2) and incubated at 30 °C.

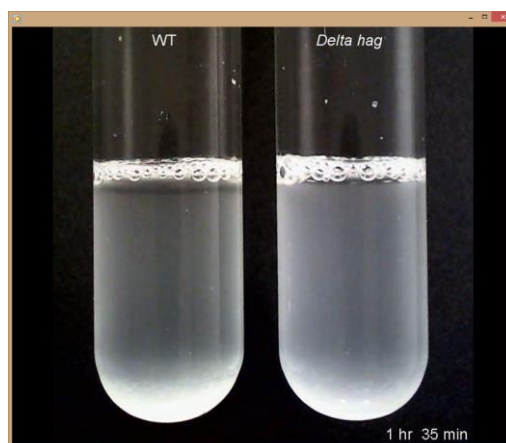

**Video S4** Pellicle formation of *B. subtilis* cultures recorded from the side of the glass tubes. Cultures were inoculated in MSgg medium at low cell densities ( $OD_{500}$  of 0.005) and incubated at 30 °C.

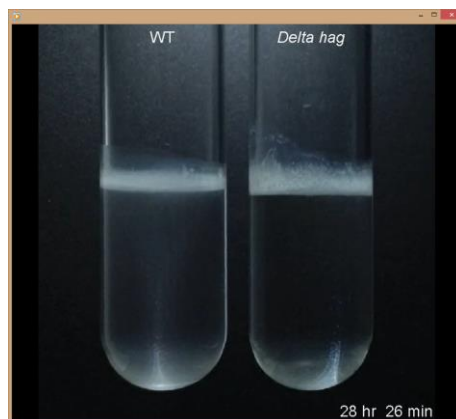

**Video S5** Pellicle formation of *P. aeruginosa* cultures recorded from the side of the glass tubes. Cultures were inoculated in LB medium at high cell densities ( $OD_{500}$  of 2.0) and incubated at 37 °C.

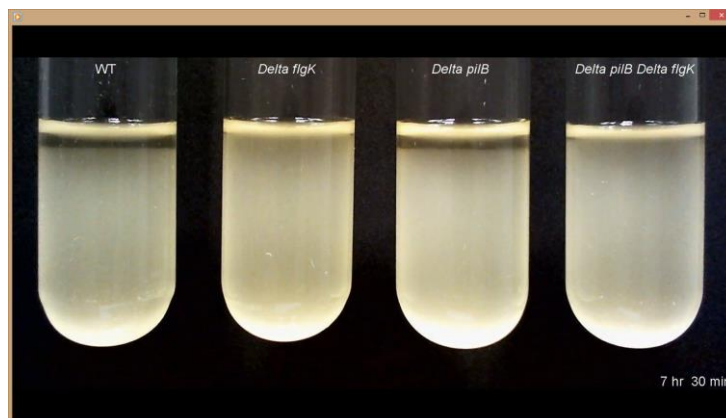

**Video S6** Pellicle formation of *P. aeruginosa* cultures recorded from the side of the glass tubes. Cultures were inoculated in LB medium at low cell densities ( $OD_{500}$  of 0.005) and incubated at 37 °C.

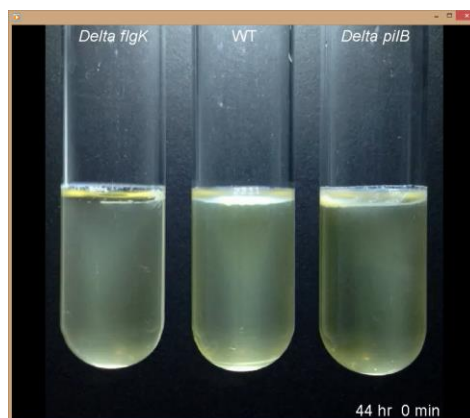

**Video S7** Pellicle formation of *B. subtilis* cultures recorded from the side of the glass tubes. Wild type,  $\Delta hag$  and  $\Delta hemAT$  cultures (from left to right) were inoculated in MSgg medium at high cell densities ( $OD_{500}$  of 1.0-1.2) and incubated at 30 °C.

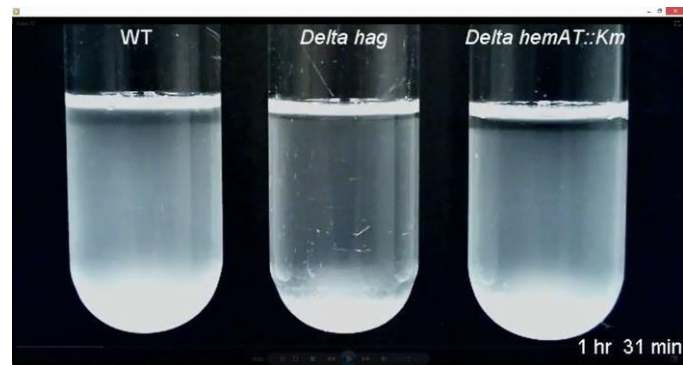

Supplement: NIHMS765128-supplement-suppl_data.pdf [file NIHMS765128-supplement-suppl_data.pdf]
